# Supplementary material
Source: PubMed Central journal article supplement (PMC9297651)
Supplement: 12871_2022_1774_MOESM1_ESM.pdf [file 12871_2022_1774_MOESM1_ESM.pdf]

**Supplementary Table 1.** Postoperative complications (extended Clavien–Dindo classification grade  $\geq$  II)

| Postoperative complication              | <i>n</i> |
|-----------------------------------------|----------|
| Haemorrhage                             | 7        |
| Atelectasis/sputum excretion difficulty | 6        |
| Thrombosis/embolism                     | 6        |
| Intraabdominal abscess                  | 6        |
| Supraventricular arrhythmia             | 4        |
| Ventricular arrhythmia                  | 2        |
| Pleural effusion                        | 3        |
| Pancreatic fistula                      | 3        |
| Pneumonia                               | 2        |
| Chylothorax                             | 1        |
| Ascites                                 | 2        |
| Delayed gastric emptying                | 1        |
| Biliary fistula                         | 1        |
| Gastrointestinal anastomotic leak       | 1        |
| Wound infection                         | 1        |
| Others                                  |          |
| Hypotension                             | 11       |
| Urinary tract infection                 | 2        |
| Infection (focus unknown)               | 1        |

*n* numbers
