# Supplementary material
Source: PubMed Central journal article supplement (PMC9297651)
Supplement: 12871_2022_1774_MOESM2_ESM.pdf [file 12871_2022_1774_MOESM2_ESM.pdf]

**Supplementary Table 2.** Distribution of the patients in the no-complication and complication groups according to clinical department of surgery

| Clinical department of surgery, <i>n</i>          | No complication group<br>( <i>n</i> =90) | Complication group<br>( <i>n</i> =60) |
|---------------------------------------------------|------------------------------------------|---------------------------------------|
| Respiratory surgery ( <i>n</i> =31)               | 25                                       | 6                                     |
| Neurosurgery ( <i>n</i> =30)                      | 29                                       | 1                                     |
| Hepato-biliary-pancreatic surgery ( <i>n</i> =25) | 10                                       | 15                                    |
| Gastrointestinal surgery ( <i>n</i> =19)          | 4                                        | 15                                    |
| Cardiovascular surgery ( <i>n</i> =12)            | 3                                        | 9                                     |
| Urology ( <i>n</i> =9)                            | 3                                        | 6                                     |
| Oral surgery ( <i>n</i> =8)                       | 5                                        | 3                                     |
| Otolaryngology ( <i>n</i> =7)                     | 5                                        | 2                                     |
| Orthopaedic surgery ( <i>n</i> =5)                | 2                                        | 3                                     |
| Breast-thyroid surgery ( <i>n</i> =4)             | 4                                        | 0                                     |

*n* numbers
