# Supplementary material
Source: PubMed Central journal article supplement (PMC9297651)
Supplement: 12871_2022_1774_MOESM3_ESM.pdf [file 12871_2022_1774_MOESM3_ESM.pdf]

**Supplementary Fig.1** Differences in the mean of HRG levels on postoperative day 1 in the groups with and without postoperative complications by department of surgery

| Department, n                           | Difference in mean HRG levels ( $\mu\text{g/mL}$ ) |
|-----------------------------------------|----------------------------------------------------|
| All, n=150                              | 5.49 (2.71 – 8.27)                                 |
| Respiratory surgery, n=31               | 4.57 (-4.45 – 13.60)                               |
| Hepato-biliary-pancreatic surgery, n=25 | 1.93 (-1.97 – 5.83)                                |

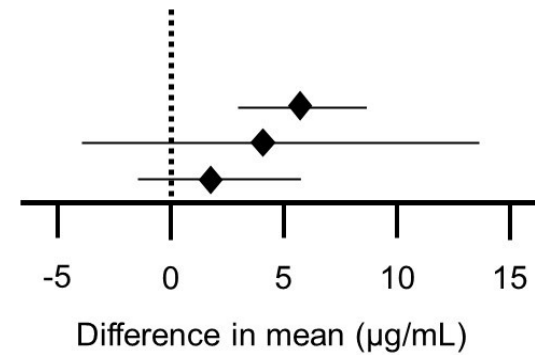

Difference: [HRG levels on POD 1 in the no-complication group] minus [HRG levels on POD 1 in the complication group]

Differences are presented as mean (diamond shape) and 95% CI (whiskers).

T-tests were used.

CI confidence interval, HRG histidine-rich glycoprotein, n number, POD 1 postoperative day 1
