# Supplementary material
Source: PubMed Central journal article supplement (PMC9297651)
Supplement: 12871_2022_1774_MOESM4_ESM.pdf [file 12871_2022_1774_MOESM4_ESM.pdf]

**Supplementary Fig.2** Levels of plasma biomarkers in the groups with and without postoperative infectious complications

(a)

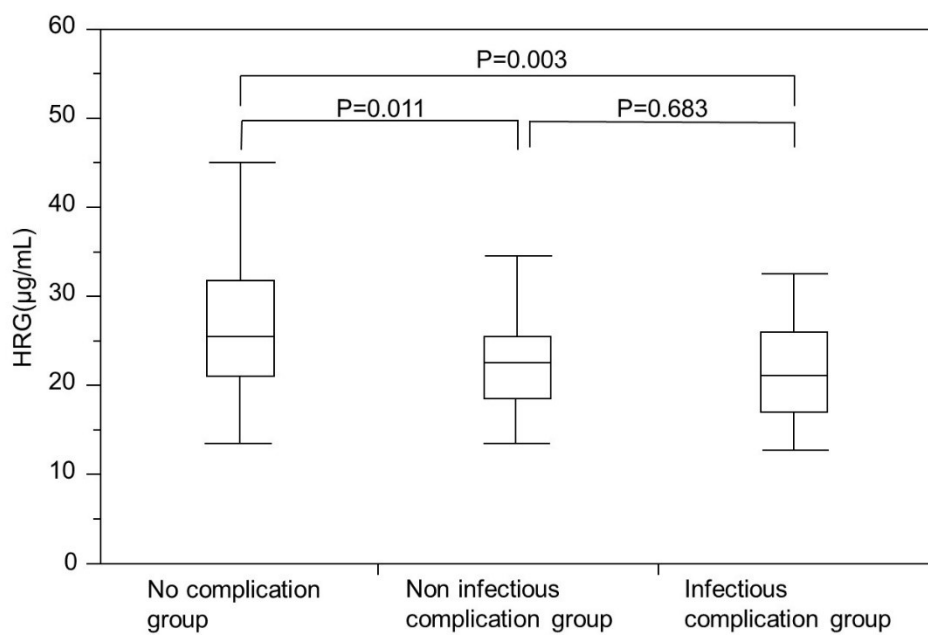

(b)

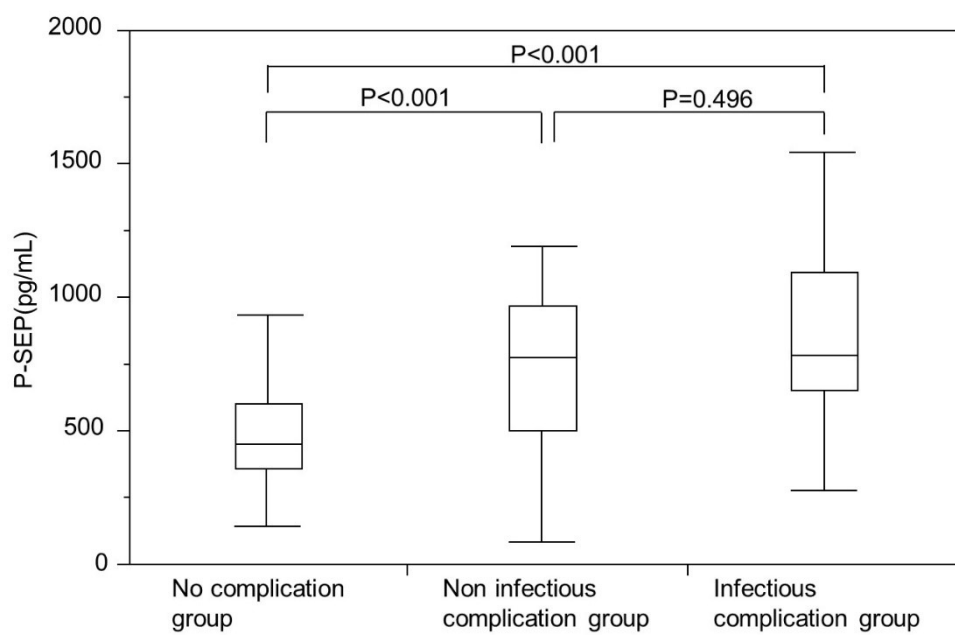

(c)

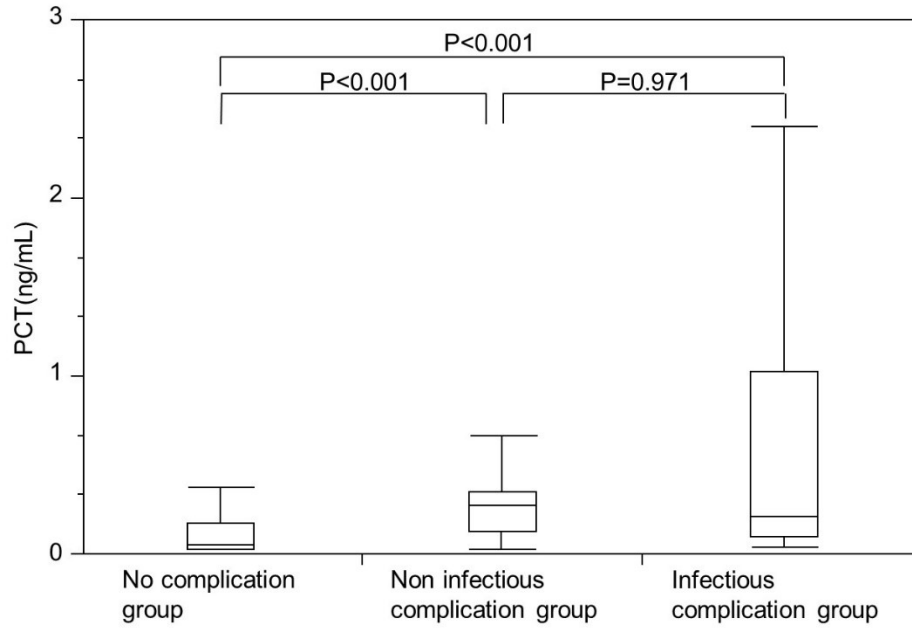

(d)

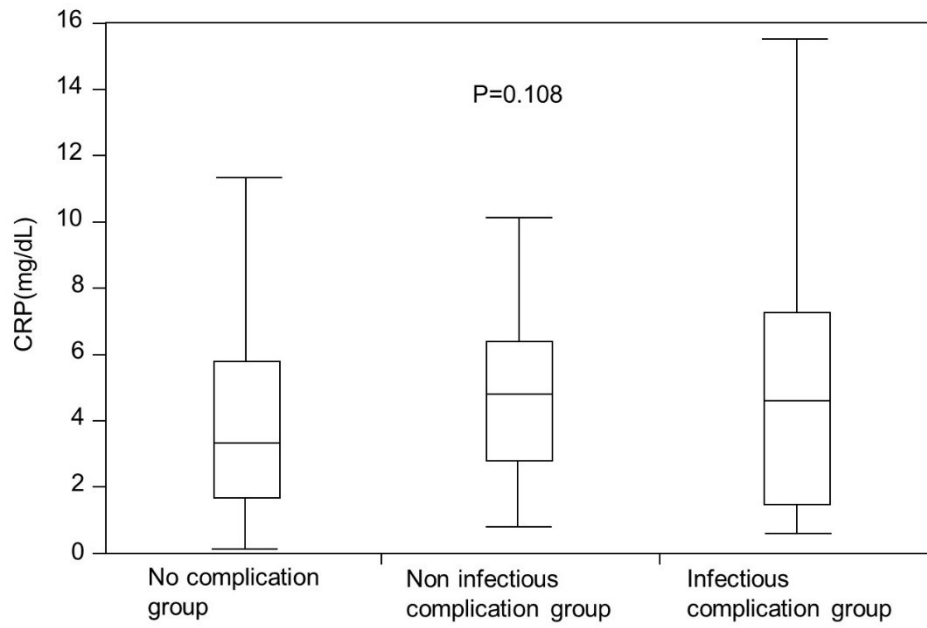

(e)

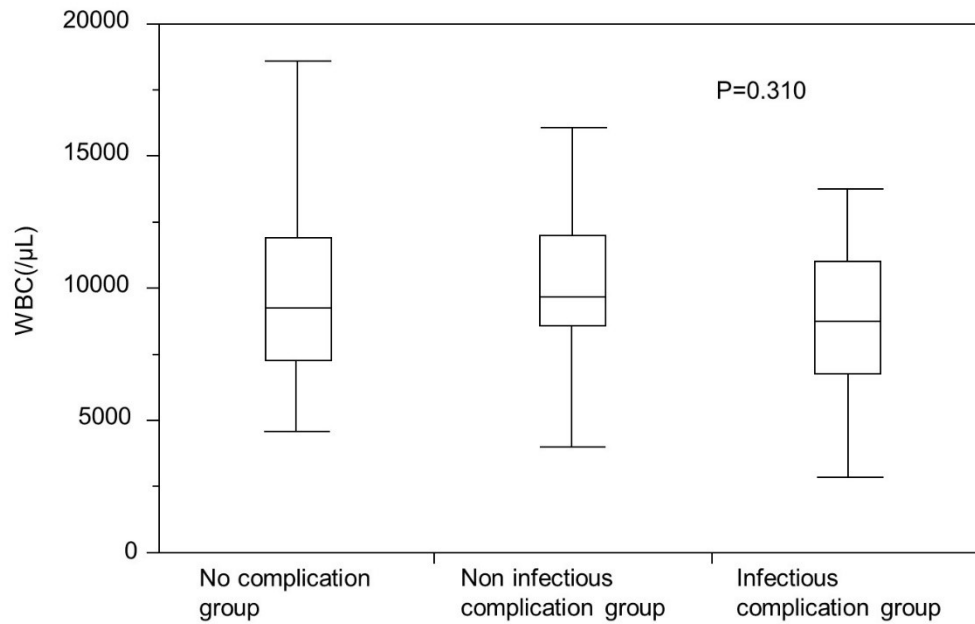

We compared each biomarker level among the no-complication group (n=90), non-infectious-complication group (n=33), and infectious-complication group (n=27).

(a) HRG; (b) P-SEP; (c) PCT; (d) CRP; (e) WBC levels among the three groups.

The box shows the median, 25th, and 75th percentiles. Bar represent the 5th and 95th percentiles.

The Kruskal–Wallis and Steel–Dwass tests were used.

P-value <0.05 was considered significant.

*CRP* C-reactive protein, *HRG* histidine-rich glycoprotein, *P-SEP* presepsin, *PCT* procalcitonin, *WBC* white blood cell
